# Supplementary material
Source: ML conference proceedings conference paper supplement (https://openreview.net/forum?id=TCQW6Bxl9G)
Supplement: supplementary_material [file attributes_anno.xlsx]

## Sheet: Sheet1
dvSave-2022_10_11_19_24_36		1					1			1	1
dvSave-2022_10_11_19_27_02		1					1		1	1	1
dvSave-2022_10_11_19_30_04		1					1		1	1	1
dvSave-2022_10_11_19_33_12		1	1				1		1	1	1
dvSave-2022_10_11_19_35_50		1					1		1	1	1
dvSave-2022_10_11_19_38_10	1						1			1	1
dvSave-2022_10_11_19_40_54	1	1					1			1
dvSave-2022_10_11_19_43_03		1		1		1	1	1	1	1	1
dvSave-2022_10_11_19_51_27		1			1		1			1		1
dvSave-2022_10_11_19_54_01		1			1		1		1	1		1
dvSave-2022_10_11_19_58_23		1		1			1		1	1	1
dvSave-2022_10_11_20_00_30	1	1					1	1	1	1	1
dvSave-2022_10_11_20_04_31		1		1	1	1	1		1	1	1	1
dvSave-2022_10_11_20_10_01		1			1	1	1	1		1		1	1
dvSave-2022_10_11_20_26_34		1					1		1	1
dvSave-2022_10_11_20_32_56	1	1				1	1		1	1	1
dvSave-2022_10_11_20_36_10		1			1	1	1	1	1	1	1	1
dvSave-2022_10_11_20_47_39	1	1				1	1	1	1	1	1
dvSave-2022_10_11_20_58_24		1	1				1	1
dvSave-2022_10_11_21_02_23		1					1		1		1
dvSave-2022_10_11_21_08_08		1	1	1			1	1	1		1
dvSave-2022_10_11_22_56_18		1			1		1		1		1	1
dvSave-2022_10_11_22_58_53	1	1			1		1					1
dvSave-2022_10_11_23_03_01					1	1			1		1	1
dvSave-2022_10_11_23_08_48		1			1		1		1			1
dvSave-2022_10_11_23_12_04		1								1			1
dvSave-2022_10_11_23_14_46		1					1		1		1
dvSave-2022_10_11_23_21_19									1	1	1	1	1
dvSave-2022_10_11_23_25_00					1				1			1
dvSave-2022_10_12_16_38_09		1			1	1	1		1			1
dvSave-2022_10_12_16_41_23		1			1	1			1			1
dvSave-2022_10_12_16_49_34		1				1
dvSave-2022_10_12_16_56_33		1			1	1	1		1		1	1
dvSave-2022_10_12_17_06_18	1	1			1	1	1	1	1		1	1
dvSave-2022_10_12_17_08_41		1					1		1		1
dvSave-2022_10_12_19_12_01							1		1			1
dvSave-2022_10_12_19_34_05					1		1	1	1			1
dvSave-2022_10_12_19_38_36	1	1			1	1	1		1	1		1
dvSave-2022_10_12_19_41_09	1	1			1	1	1		1	1		1
dvSave-2022_10_12_19_50_17		1			1	1	1		1			1
dvSave-2022_10_12_19_54_10		1		1	1		1				1	1
dvSave-2022_10_12_19_59_19		1			1		1				1	1	1
dvSave-2022_10_12_20_04_07		1		1	1		1		1		1	1
dvSave-2022_10_12_20_08_51		1		1	1		1		1			1	1
dvSave-2022_10_12_20_12_47		1	1		1	1	1		1			1
dvSave-2022_10_12_20_18_19							1	1	1
dvSave-2022_10_12_20_20_45		1				1	1				1
dvSave-2022_10_12_20_23_52											1
dvSave-2022_10_12_20_50_34		1	1		1		1	1	1		1	1	1
dvSave-2022_10_12_20_53_03	1	1			1	1	1	1			1	1
dvSave-2022_10_12_20_55_47		1			1	1	1		1		1	1
dvSave-2022_10_13_17_41_57		1			1		1			1		1
dvSave-2022_10_13_17_45_27		1			1		1			1		1
dvSave-2022_10_13_17_48_30	1	1			1		1			1		1
dvSave-2022_10_13_17_52_33		1					1	1		1	1
dvSave-2022_10_13_17_55_17	1	1			1		1
dvSave-2022_10_13_18_04_52		1			1		1					1	1
dvSave-2022_10_13_18_15_02		1			1		1	1		1	1	1
dvSave-2022_10_13_18_19_20		1			1		1		1	1		1
dvSave-2022_10_13_18_24_31	1	1			1	1	1		1	1	1	1	1
dvSave-2022_10_13_18_28_26		1			1	1	1		1		1
dvSave-2022_10_13_18_38_14					1				1			1
dvSave-2022_10_13_18_41_11		1			1							1
dvSave-2022_10_13_18_44_24	1	1			1	1		1				1
dvSave-2022_10_13_18_47_46				1			1				1	1	1
dvSave-2022_10_13_18_50_28		1			1	1						1
dvSave-2022_10_13_18_55_08	1	1			1							1	1
dvSave-2022_10_13_18_59_36					1	1	1		1			1
dvSave-2022_10_13_19_34_01	1	1			1	1	1					1
dvSave-2022_10_13_19_36_25		1			1		1		1			1
dvSave-2022_10_13_19_39_04		1			1	1	1		1			1
dvSave-2022_10_13_19_44_33		1					1						1
dvSave-2022_10_13_19_46_46	1	1			1		1					1	1
dvSave-2022_10_13_19_49_18		1	1			1	1	1	1
dvSave-2022_10_13_19_51_33		1	1		1	1	1	1	1			1
dvSave-2022_10_13_20_42_57	1	1							1			1	1
dvSave-2022_10_13_21_59_37		1				1	1		1
dvSave-2022_10_13_22_02_55		1										1	1
dvSave-2022_10_13_22_05_48		1										1	1
dvSave-2022_10_13_22_08_39		1		1			1		1			1
dvSave-2022_10_13_22_11_19		1					1		1		1	1	1
dvSave-2022_10_13_22_14_06		1		1		1	1		1
dvSave-2022_10_14_10_10_20											1
dvSave-2022_10_14_10_13_05						1	1		1
dvSave-2022_10_14_10_16_59									1
dvSave-2022_10_14_10_19_17		1					1	1	1
dvSave-2022_10_14_10_20_44		1				1	1	1	1
dvSave-2022_10_14_10_23_17		1			1	1		1	1			1
dvSave-2022_10_14_10_25_18		1			1	1		1	1			1	1
dvSave-2022_10_14_10_28_24						1	1		1			1	1
dvSave-2022_10_14_10_33_03		1				1	1	1	1
dvSave-2022_10_14_10_43_22										1	1
dvSave-2022_10_14_10_45_25		1				1		1		1	1
dvSave-2022_10_14_10_47_24		1		1		1	1
dvSave-2022_10_14_10_50_54					1	1				1		1
dvSave-2022_10_14_10_53_22		1		1		1	1	1	1
dvSave-2022_10_14_10_57_48	1				1	1					1	1
dvSave-2022_10_14_11_01_24									1		1
dvSave-2022_10_14_11_05_17						1	1		1			1	1
dvSave-2022_10_14_11_12_25	1				1	1			1			1
dvSave-2022_10_14_11_14_58		1		1		1	1	1	1
dvSave-2022_10_14_11_17_12	1	1		1	1	1	1		1			1
dvSave-2022_10_15_17_23_28		1		1		1	1	1	1			1	1
dvSave-2022_10_15_17_25_18		1				1	1		1
dvSave-2022_10_15_17_26_54		1			1		1		1			1
dvSave-2022_10_15_17_28_31		1			1	1
dvSave-2022_10_15_17_30_28		1					1	1	1
dvSave-2022_10_15_17_32_47		1		1	1	1	1	1	1			1
dvSave-2022_10_15_17_34_38		1			1							1
dvSave-2022_10_15_17_36_42					1	1
dvSave-2022_10_15_17_39_08		1				1					1
dvSave-2022_10_15_17_43_42				1	1	1	1	1				1		1
dvSave-2022_10_15_19_13_45		1		1		1	1		1
dvSave-2022_10_15_19_17_03		1		1	1	1	1	1	1			1
dvSave-2022_10_15_19_19_54		1				1			1
dvSave-2022_10_15_19_22_18		1		1	1	1	1	1	1
dvSave-2022_10_15_19_26_34		1		1	1	1	1		1	1		1
dvSave-2022_10_15_19_29_54				1	1	1	1		1			1
dvSave-2022_10_15_19_31_55		1				1	1	1	1
dvSave-2022_10_15_19_34_48		1			1	1	1	1	1		1	1
dvSave-2022_10_15_19_38_26							1		1
dvSave-2022_10_15_19_42_04		1			1	1	1	1	1			1
dvSave-2022_10_15_19_45_29		1		1	1	1	1		1			1
dvSave-2022_10_15_19_47_46		1		1	1	1	1	1	1			1
dvSave-2022_10_15_19_50_15		1			1	1	1	1	1			1
dvSave-2022_10_15_19_53_13		1		1	1	1	1	1	1			1
dvSave-2022_10_15_20_00_32					1	1			1
dvSave-2022_10_15_20_05_28					1				1
dvSave-2022_10_15_20_10_36					1				1			1
dvSave-2022_10_15_20_15_03					1	1			1
dvSave-2022_10_15_20_17_30		1			1				1
dvSave-2022_10_15_20_51_50		1
dvSave-2022_10_15_20_55_07		1			1				1
dvSave-2022_10_15_20_59_45		1			1				1			1
dvSave-2022_10_15_21_03_15	1	1			1				1			1
dvSave-2022_10_15_21_15_26					1							1
dvSave-2022_10_15_21_45_55					1							1
dvSave-2022_10_15_21_48_17	1	1			1							1
dvSave-2022_10_15_21_51_15	1	1					1			1
dvSave-2022_10_15_21_54_56	1	1			1
dvSave-2022_10_15_21_59_38					1				1			1	1
dvSave-2022_10_15_22_03_19	1	1		1	1		1					1
dvSave-2022_10_15_22_05_51	1	1			1	1			1			1
dvSave-2022_10_15_22_08_12	1	1			1	1	1					1
dvSave-2022_10_15_22_10_31	1	1			1	1			1			1
dvSave-2022_10_16_15_44_04		1			1		1	1	1			1	1
dvSave-2022_10_16_15_46_32		1		1	1		1	1	1
dvSave-2022_10_16_15_49_50									1		1
dvSave-2022_10_16_15_53_55					1				1			1
dvSave-2022_10_16_15_56_06					1	1			1			1	1
dvSave-2022_10_16_15_58_04						1			1			1
dvSave-2022_10_16_16_01_00		1		1			1		1
dvSave-2022_10_16_16_02_42		1		1	1	1	1		1			1
dvSave-2022_10_16_16_04_57		1		1	1		1		1			1
dvSave-2022_10_16_16_07_40		1				1	1	1	1	1
dvSave-2022_10_16_16_09_25		1		1	1	1	1		1	1		1
dvSave-2022_10_16_16_14_36					1	1			1			1
dvSave-2022_10_16_16_16_41				1	1	1	1		1			1
dvSave-2022_10_16_16_20_08								1	1				1
dvSave-2022_10_16_16_22_08		1			1				1			1	1
dvSave-2022_10_16_16_23_59		1				1		1	1
dvSave-2022_10_16_16_28_32		1				1			1	1	1
dvSave-2022_10_16_16_32_48					1	1				1		1
dvSave-2022_10_16_16_34_32		1		1	1		1			1		1	1
dvSave-2022_10_16_16_37_17		1		1			1	1				1	1
dvSave-2022_10_16_16_39_08		1			1	1		1				1
dvSave-2022_10_16_19_13_12		1			1							1
dvSave-2022_10_16_19_15_57					1			1				1
dvSave-2022_10_16_19_18_27	1	1			1							1
dvSave-2022_10_16_19_21_51						1		1			1
dvSave-2022_10_16_19_24_24	1				1	1		1				1
dvSave-2022_10_16_19_27_52					1	1		1	1			1	1
dvSave-2022_10_16_19_31_46		1		1		1	1	1	1
dvSave-2022_10_16_19_34_18		1			1	1		1	1			1
dvSave-2022_10_16_19_36_53		1			1	1	1	1	1			1
dvSave-2022_10_16_19_39_28		1			1	1		1	1			1
dvSave-2022_10_16_19_45_09		1			1			1				1	1
dvSave-2022_10_16_19_47_35	1	1				1		1
dvSave-2022_10_16_19_49_53	1	1			1	1			1			1
dvSave-2022_10_16_19_53_02	1	1		1		1	1
dvSave-2022_10_16_19_55_34	1	1			1	1	1	1	1			1
dvSave-2022_10_16_19_58_16	1	1			1	1						1
dvSave-2022_10_16_20_00_53	1	1		1	1	1	1	1	1			1
dvSave-2022_10_16_20_03_57	1	1							1			1	1
dvSave-2022_10_16_20_07_22	1	1			1	1		1	1			1
dvSave-2022_10_16_20_10_30	1			1	1	1	1		1			1
dvSave-2022_10_16_20_14_19					1						1	1
dvSave-2022_10_16_20_16_44		1			1			1				1
dvSave-2022_10_16_20_19_03	1	1			1							1
dvSave-2022_10_16_20_22_55		1							1		1
dvSave-2022_10_16_20_25_17		1			1		1		1
dvSave-2022_10_16_20_28_30		1			1			1	1			1	1
dvSave-2022_10_16_20_31_55	1	1			1		1		1			1
dvSave-2022_10_16_20_34_13	1	1			1	1	1		1			1
dvSave-2022_10_16_20_36_28	1	1			1	1	1		1			1
dvSave-2022_10_16_20_38_47	1	1			1	1			1			1
dvSave-2022_10_16_20_46_28		1			1		1					1
dvSave-2022_10_16_20_48_58		1			1		1					1
dvSave-2022_10_16_20_52_16		1					1		1		1
dvSave-2022_10_16_20_54_56			1		1	1		1			1	1	1
dvSave-2022_10_16_20_58_04		1	1		1	1	1	1	1		1	1
dvSave-2022_10_16_21_00_36		1		1	1		1	1	1		1	1
dvSave-2022_10_16_21_03_26		1	1		1	1	1	1				1	1
dvSave-2022_10_16_21_06_54		1	1		1	1	1		1			1
dvSave-2022_10_16_23_04_54		1			1						1	1
dvSave-2022_10_16_23_54_17		1	1		1	1	1	1				1
dvSave-2022_10_16_23_56_58	1	1			1	1	1	1				1
dvSave-2022_10_17_00_04_37	1	1		1	1	1	1		1		1	1
dvSave-2022_10_17_00_07_31		1			1	1		1	1			1
dvSave-2022_10_17_00_10_09		1		1	1		1		1		1	1
dvSave-2022_10_17_00_12_51		1		1	1	1	1		1		1	1
dvSave-2022_10_17_00_15_03		1		1	1		1	1	1		1	1
dvSave-2022_10_17_00_17_54		1		1	1	1	1	1	1		1	1
dvSave-2022_10_17_00_20_38		1			1	1	1	1	1			1
dvSave-2022_10_17_00_23_21	1	1		1	1	1	1		1			1
dvSave-2022_10_17_21_00_49		1				1	1		1
dvSave-2022_10_17_21_11_23		1			1		1	1	1	1		1
dvSave-2022_10_17_21_13_52	1	1			1		1	1		1		1
dvSave-2022_10_17_21_20_26							1	1	1	1	1
dvSave-2022_10_17_21_23_22		1			1				1			1
dvSave-2022_10_17_21_29_30		1			1		1	1	1			1	1
dvSave-2022_10_17_21_32_22	1	1		1	1		1	1	1			1
dvSave-2022_10_17_21_34_50	1	1			1	1	1	1	1			1
dvSave-2022_10_17_21_38_40	1	1		1	1	1	1	1	1			1
dvSave-2022_10_17_21_41_43		1		1	1	1	1		1			1
dvSave-2022_10_17_21_44_10	1	1	1		1		1	1	1			1
dvSave-2022_10_17_21_46_39	1	1	1			1		1	1
dvSave-2022_10_17_21_49_06	1	1	1		1	1	1	1	1
dvSave-2022_10_17_21_51_21	1	1					1	1	1
dvSave-2022_10_17_21_53_25	1	1			1	1	1	1	1
dvSave-2022_10_17_21_57_22		1	1			1	1	1	1
dvSave-2022_10_17_22_00_13	1	1	1		1	1	1	1	1			1
dvSave-2022_10_17_22_06_30					1	1			1			1
dvSave-2022_10_17_22_09_44	1	1			1	1	1		1			1	1
dvSave-2022_10_17_22_13_40	1	1	1		1	1	1		1			1	1
dvSave-2022_10_17_22_15_50		1	1		1	1			1		1	1
dvSave-2022_10_17_23_10_10		1					1				1	1	1
dvSave-2022_10_17_23_12_14		1			1		1				1	1
dvSave-2022_10_17_23_14_16	1	1					1				1
dvSave-2022_10_17_23_17_28	1	1					1		1		1
dvSave-2022_10_17_23_22_01					1			1	1			1	1
dvSave-2022_10_17_23_24_28	1	1			1		1	1	1		1	1	1
dvSave-2022_10_17_23_26_52		1		1	1		1		1	1	1	1
dvSave-2022_10_17_23_28_50		1			1	1	1		1		1	1
dvSave-2022_10_17_23_30_59	1	1			1	1	1	1	1	1		1	1
dvSave-2022_10_17_23_33_46		1	1		1	1	1	1	1	1		1	1
dvSave-2022_10_17_23_37_44		1			1		1			1	1	1
dvSave-2022_10_17_23_40_02		1			1		1	1		1		1	1
dvSave-2022_10_17_23_42_44	1	1					1	1
dvSave-2022_10_17_23_44_53		1		1			1		1	1	1
dvSave-2022_10_17_23_48_39		1			1		1		1	1
dvSave-2022_10_17_23_53_03	1	1			1		1	1	1	1		1	1
dvSave-2022_10_17_23_55_09	1	1		1	1		1		1	1	1	1
dvSave-2022_10_17_23_57_28		1			1	1	1		1			1
dvSave-2022_10_17_23_59_45	1	1			1	1	1		1			1
dvSave-2022_10_18_00_01_54		1			1		1		1			1
dvSave-2022_10_18_23_26_55		1			1		1				1	1	1
dvSave-2022_10_18_23_29_35		1	1	1	1		1	1			1	1
dvSave-2022_10_18_23_31_42	1	1	1		1		1	1				1	1
dvSave-2022_10_18_23_33_48	1	1	1			1	1	1	1
dvSave-2022_10_18_23_36_07		1	1		1	1	1	1
dvSave-2022_10_18_23_39_05		1				1		1	1	1
dvSave-2022_10_18_23_42_12		1			1	1	1		1			1
dvSave-2022_10_18_23_44_38		1	1		1	1	1	1	1			1
dvSave-2022_10_18_23_46_59	1	1	1		1	1	1	1	1			1
dvSave-2022_10_18_23_49_47	1	1			1		1		1			1
dvSave-2022_10_19_00_34_14		1			1					1	1	1
dvSave-2022_10_19_00_36_45		1			1		1		1	1		1	1
dvSave-2022_10_19_00_39_02	1	1			1		1			1		1	1
dvSave-2022_10_19_00_44_20	1	1			1	1	1			1		1	1
dvSave-2022_10_19_00_46_33	1	1					1		1	1	1	1	1
dvSave-2022_10_19_00_48_23	1	1			1	1	1			1		1	1
dvSave-2022_10_19_00_50_57		1		1	1		1	1		1		1	1
dvSave-2022_10_19_00_53_47		1			1		1			1		1	1
dvSave-2022_10_19_00_56_17		1			1		1				1	1	1
dvSave-2022_10_19_00_58_46	1	1			1	1	1		1	1		1	1
dvSave-2022_10_19_10_42_04				1			1		1		1
dvSave-2022_10_19_10_44_05					1				1
dvSave-2022_10_19_10_46_44		1		1			1	1	1
dvSave-2022_10_19_10_49_05		1		1	1	1	1	1	1	1
dvSave-2022_10_19_10_52_04	1				1				1	1		1	1
dvSave-2022_10_19_10_54_25	1			1	1	1	1		1	1		1
dvSave-2022_10_19_10_56_40	1			1	1	1	1		1			1
dvSave-2022_10_19_10_59_05		1			1	1		1	1	1		1
dvSave-2022_10_19_11_03_20		1			1	1		1	1	1		1	1
dvSave-2022_10_19_11_05_49		1		1	1	1	1	1	1	1		1
dvSave-2022_10_19_12_18_26							1				1
dvSave-2022_10_19_12_21_01		1			1				1
dvSave-2022_10_19_12_23_22		1				1		1
dvSave-2022_10_19_12_25_32		1			1	1		1
dvSave-2022_10_19_12_28_03		1			1	1						1
dvSave-2022_10_19_12_30_22		1			1	1						1	1
dvSave-2022_10_19_12_33_47		1		1	1		1		1			1
dvSave-2022_10_19_12_36_11	1				1	1			1			1
dvSave-2022_10_19_12_39_00		1			1	1	1
dvSave-2022_10_19_12_42_29	1	1			1	1	1	1				1	1
dvSave-2022_10_19_15_10_46		1					1				1
dvSave-2022_10_19_15_13_07		1			1		1		1			1	1
dvSave-2022_10_19_15_15_10		1			1		1
dvSave-2022_10_19_15_17_44		1			1		1	1	1			1
dvSave-2022_10_19_15_26_16		1				1	1		1	1	1		1
dvSave-2022_10_19_15_28_26		1		1	1	1	1		1
dvSave-2022_10_19_15_31_29		1				1	1		1				1
dvSave-2022_10_19_15_34_11	1	1			1	1	1	1	1			1	1
dvSave-2022_10_19_15_37_55		1				1	1		1				1
dvSave-2022_10_19_15_40_29	1	1			1	1	1		1
dvSave-2022_10_19_16_04_42						1			1	1
dvSave-2022_10_19_16_19_54						1			1				1
dvSave-2022_10_19_16_23_13				1			1		1
dvSave-2022_10_19_16_25_33		1			1	1		1	1
dvSave-2022_10_19_16_28_11		1		1	1		1		1	1		1
dvSave-2022_10_19_16_30_26	1	1		1		1	1		1	1
dvSave-2022_10_19_16_32_42		1		1	1	1	1		1	1		1
dvSave-2022_10_19_16_34_50		1		1		1	1		1
dvSave-2022_10_19_16_43_52		1		1		1	1		1	1
dvSave-2022_10_19_16_46_00		1		1		1	1		1	1
dvSave-2022_10_19_16_48_51	1	1		1	1	1	1		1	1		1
dvSave-2022_10_19_16_51_07		1		1	1		1		1	1		1
dvSave-2022_10_19_16_53_46	1	1			1	1	1		1			1	1
dvSave-2022_10_19_16_57_27		1		1		1	1		1		1
dvSave-2022_10_19_17_00_44		1		1		1	1		1
dvSave-2022_10_19_17_04_22		1		1		1	1		1
dvSave-2022_10_19_17_07_18		1		1			1		1	1
dvSave-2022_10_20_18_09_14		1			1	1	1	1			1	1
dvSave-2022_10_20_18_11_26		1			1		1	1			1	1
dvSave-2022_10_20_18_14_03	1	1			1			1	1			1
dvSave-2022_10_20_18_16_24	1	1			1			1	1			1
dvSave-2022_10_20_18_18_50	1	1		1	1		1	1	1			1	1
dvSave-2022_10_20_18_21_55		1		1	1		1	1	1			1
dvSave-2022_10_20_18_24_51	1	1		1	1		1		1			1
dvSave-2022_10_20_18_27_08	1	1			1	1		1	1			1
dvSave-2022_10_20_18_29_18	1	1		1	1	1	1	1	1			1
dvSave-2022_10_20_18_32_10		1		1	1	1	1	1	1			1
dvSave-2022_10_20_18_36_33		1			1		1		1	1	1	1
dvSave-2022_10_20_18_39_10		1					1	1	1	1	1
dvSave-2022_10_20_18_41_08		1			1		1	1	1	1
dvSave-2022_10_20_18_43_16	1	1			1		1	1	1	1		1
dvSave-2022_10_20_18_45_24	1	1			1		1		1	1		1
dvSave-2022_10_20_18_47_34		1			1	1	1		1	1		1
dvSave-2022_10_20_18_49_30		1		1	1	1	1		1			1
dvSave-2022_10_20_18_52_46	1	1			1	1	1		1	1	1	1
dvSave-2022_10_20_18_55_13	1	1		1	1		1		1	1	1
dvSave-2022_10_20_18_57_19	1	1			1	1	1		1	1		1
dvSave-2022_10_20_19_07_02							1	1	1		1
dvSave-2022_10_20_19_09_40		1		1	1		1	1	1
dvSave-2022_10_20_19_12_59	1	1			1		1	1	1			1	1
dvSave-2022_10_20_19_15_25		1			1	1	1	1	1			1
dvSave-2022_10_20_19_17_34		1			1		1	1	1			1	1
dvSave-2022_10_20_19_19_59	1	1			1	1	1	1	1			1
dvSave-2022_10_20_19_22_10		1		1	1	1	1	1	1			1
dvSave-2022_10_20_19_24_44	1	1			1		1	1	1			1
dvSave-2022_10_20_19_27_41		1			1	1	1		1			1
dvSave-2022_10_20_19_29_51		1			1	1		1	1		1	1
dvSave-2022_10_20_19_34_49		1					1	1			1
dvSave-2022_10_20_19_36_58		1			1				1
dvSave-2022_10_20_19_38_57		1			1		1	1	1		1	1
dvSave-2022_10_20_19_41_08		1			1		1	1	1			1
dvSave-2022_10_20_19_43_09	1	1			1		1	1	1		1	1
dvSave-2022_10_20_19_45_32	1	1			1	1	1		1			1	1
dvSave-2022_10_20_19_47_52		1		1	1		1	1	1			1
dvSave-2022_10_20_19_50_44	1			1	1	1	1		1		1	1
dvSave-2022_10_20_19_52_47	1	1		1	1		1				1	1
dvSave-2022_10_20_19_55_02	1	1		1	1	1	1	1	1			1
dvSave-2022_10_20_20_00_22	1				1			1			1	1	1
dvSave-2022_10_20_20_02_23	1	1	1		1		1	1		1	1	1
dvSave-2022_10_20_20_04_46	1	1	1	1	1	1	1	1				1	1
dvSave-2022_10_20_20_07_11		1	1	1	1		1					1
dvSave-2022_10_20_20_09_31	1	1	1		1	1			1		1	1
dvSave-2022_10_20_20_15_27		1					1	1	1		1
dvSave-2022_10_20_20_17_36	1	1			1			1	1
dvSave-2022_10_20_20_19_40		1			1		1		1			1
dvSave-2022_10_20_20_22_21		1			1		1		1		1	1
dvSave-2022_10_20_20_24_43	1	1			1				1			1	1
dvSave-2022_10_20_20_27_24		1		1	1		1	1	1		1	1
dvSave-2022_10_20_20_29_56	1	1		1	1	1	1	1	1		1	1
dvSave-2022_10_20_20_32_38		1		1	1	1	1	1	1			1
dvSave-2022_10_20_20_35_02	1			1	1	1	1	1	1		1	1
dvSave-2022_10_20_20_38_08		1		1	1	1	1	1	1		1	1
dvSave-2022_10_20_20_45_02	1				1			1	1			1
dvSave-2022_10_20_20_48_01	1	1			1				1			1
dvSave-2022_10_20_20_50_38	1				1				1			1
dvSave-2022_10_20_20_52_49	1				1	1			1			1
dvSave-2022_10_20_20_56_46	1				1	1			1		1	1
dvSave-2022_10_20_20_58_57					1	1			1
dvSave-2022_10_20_21_01_40				1	1		1		1			1
dvSave-2022_10_20_21_03_46				1	1		1		1			1
dvSave-2022_10_20_21_06_26	1	1			1	1			1			1
dvSave-2022_10_20_21_08_53	1				1	1			1			1
dvSave-2022_10_20_21_20_37		1					1				1
dvSave-2022_10_20_21_32_16	1	1			1		1		1
dvSave-2022_10_20_21_34_36		1			1		1					1	1
dvSave-2022_10_20_21_36_58		1			1		1	1				1
dvSave-2022_10_20_21_39_07	1	1			1		1	1			1	1
dvSave-2022_10_20_21_41_09	1	1			1		1				1	1
dvSave-2022_10_20_21_43_27		1		1	1		1				1	1
dvSave-2022_10_20_21_45_35		1			1	1	1					1	1
dvSave-2022_10_20_21_47_57		1				1	1	1				1	1
dvSave-2022_10_20_21_50_06	1	1			1	1		1				1	1
dvSave-2022_10_20_21_55_12							1	1	1		1
dvSave-2022_10_20_21_57_32	1	1			1		1	1	1
dvSave-2022_10_20_21_59_47		1			1	1	1		1		1	1
dvSave-2022_10_20_23_38_10		1			1	1	1	1	1		1	1	1
dvSave-2022_10_20_23_40_16	1	1		1	1	1	1	1	1		1	1
dvSave-2022_10_20_23_42_39	1	1		1	1		1		1		1	1
dvSave-2022_10_20_23_45_24		1		1	1		1	1	1		1	1
dvSave-2022_10_20_23_47_55		1		1	1	1	1		1		1	1
dvSave-2022_10_20_23_50_23	1	1			1	1	1	1	1		1	1
dvSave-2022_10_20_23_52_58		1		1	1	1	1	1	1		1	1
dvSave-2022_10_21_22_16_32	1	1					1	1			1
dvSave-2022_10_21_22_18_47	1	1			1		1	1
dvSave-2022_10_21_22_41_01		1			1	1	1	1			1	1
dvSave-2022_10_21_22_43_24	1				1		1	1			1	1
dvSave-2022_10_21_22_46_01	1	1			1		1	1				1
dvSave-2022_10_21_22_48_32	1	1			1		1					1
dvSave-2022_10_21_22_50_47	1	1		1	1		1			1	1	1
dvSave-2022_10_21_22_53_32		1			1	1	1	1	1		1	1
dvSave-2022_10_21_22_56_25		1			1	1	1	1	1		1	1
dvSave-2022_10_21_22_58_52	1	1		1	1	1	1	1	1		1	1
dvSave-2022_10_22_15_21_43		1					1	1			1
dvSave-2022_10_22_15_23_51	1	1			1		1	1
dvSave-2022_10_22_15_27_12	1	1			1	1	1	1			1	1
dvSave-2022_10_22_15_29_32	1	1		1	1		1	1				1
dvSave-2022_10_22_15_33_22	1	1			1	1	1					1	1
dvSave-2022_10_22_15_36_09	1	1		1			1	1		1	1
dvSave-2022_10_22_15_40_07		1		1	1		1	1	1		1	1
dvSave-2022_10_22_15_42_27	1	1		1	1	1	1					1	1
dvSave-2022_10_22_15_44_53	1	1			1		1	1		1		1
dvSave-2022_10_22_15_47_10	1	1		1	1	1	1	1	1		1	1
dvSave-2022_10_22_16_40_05		1			1				1			1
dvSave-2022_10_22_16_43_56		1				1			1		1
dvSave-2022_10_22_16_46_41					1	1			1			1
dvSave-2022_10_22_16_49_09		1		1	1	1	1	1	1			1
dvSave-2022_10_22_16_53_32					1	1			1			1
dvSave-2022_10_22_16_56_01		1		1	1		1		1			1
dvSave-2022_10_22_16_58_35		1			1				1			1
dvSave-2022_10_22_17_00_22		1			1	1			1			1
dvSave-2022_10_22_17_09_30		1		1		1	1	1	1
dvSave-2022_10_22_17_12_23	1	1		1		1	1		1					1
dvSave-2022_10_22_17_14_50		1		1		1	1	1		1
dvSave-2022_10_22_17_16_58	1			1		1	1		1					1
dvSave-2022_10_22_17_19_09		1		1		1	1	1	1
dvSave-2022_10_22_17_21_18	1			1		1	1		1					1
dvSave-2022_10_22_17_23_34	1			1	1	1	1		1			1		1
dvSave-2022_10_22_17_25_57	1			1	1	1	1		1					1
dvSave-2022_10_22_17_28_45	1			1	1	1	1		1					1
dvSave-2022_10_22_17_31_55	1			1	1	1	1		1					1
dvSave-2022_10_22_17_34_24	1			1	1	1	1		1			1		1
dvSave-2022_10_22_17_38_53	1			1	1	1	1		1					1
dvSave-2022_10_22_17_41_04	1			1		1	1		1					1
dvSave-2022_10_22_17_44_36	1			1	1	1	1		1					1
dvSave-2022_10_22_20_20_20				1			1		1		1
dvSave-2022_10_22_20_26_28		1				1	1		1
dvSave-2022_10_22_20_32_30	1			1	1	1	1		1					1
dvSave-2022_10_22_20_35_40		1			1	1		1	1
dvSave-2022_10_22_20_39_00		1		1	1	1	1		1			1
dvSave-2022_10_22_20_41_36		1		1		1	1	1	1	1
dvSave-2022_10_22_20_44_14		1		1		1	1		1	1
dvSave-2022_10_22_20_47_17		1		1		1	1		1	1
dvSave-2022_10_22_20_50_12		1		1		1	1		1
dvSave-2022_10_22_20_53_14	1			1		1	1		1					1
dvSave-2022_10_22_20_55_34	1			1		1	1		1					1
dvSave-2022_10_22_21_01_30	1			1		1	1							1
dvSave-2022_10_22_21_04_48		1				1		1	1
dvSave-2022_10_22_21_07_53	1			1		1	1		1					1
dvSave-2022_10_22_21_11_07		1		1		1	1		1
dvSave-2022_10_22_21_14_15	1			1		1	1		1					1
dvSave-2022_10_22_21_17_10		1					1		1		1
dvSave-2022_10_22_21_21_02	1			1		1	1		1					1
dvSave-2022_10_22_21_24_22	1			1	1	1	1					1		1
dvSave-2022_10_22_21_26_59	1			1	1	1	1		1					1
dvSave-2022_10_22_21_30_26	1			1	1	1	1		1			1		1
dvSave-2022_10_22_21_33_09	1			1	1	1	1		1					1
dvSave-2022_10_23_13_35_38		1				1		1	1			1	1
dvSave-2022_10_23_13_37_48		1		1		1	1	1	1			1	1
dvSave-2022_10_23_13_39_47		1		1		1	1	1	1			1	1
dvSave-2022_10_23_13_41_46		1		1		1	1		1			1	1
dvSave-2022_10_23_13_43_51		1				1		1	1			1	1
dvSave-2022_10_23_13_46_06		1			1	1		1	1
dvSave-2022_10_23_13_48_27		1			1	1	1	1	1
dvSave-2022_10_23_13_50_35		1		1			1	1	1
dvSave-2022_10_23_13_53_37		1				1		1
dvSave-2022_10_23_13_57_37		1				1	1	1	1					1
dvSave-2022_10_23_14_02_57		1		1		1	1	1	1			1	1	1
dvSave-2022_10_23_14_05_41		1			1			1	1					1
dvSave-2022_10_23_14_08_27		1		1	1	1	1	1	1					1
dvSave-2022_10_23_14_11_58		1		1	1	1	1	1	1					1
dvSave-2022_10_23_14_14_59		1		1	1	1	1	1				1	1	1
dvSave-2022_10_23_14_17_52		1			1	1		1	1					1
dvSave-2022_10_23_14_20_43		1			1	1		1	1
dvSave-2022_10_23_14_23_08		1			1			1	1			1	1	1
dvSave-2022_10_23_14_25_06		1			1	1		1				1	1
dvSave-2022_10_23_14_27_04		1		1	1	1	1	1	1
dvSave-2022_10_23_14_29_11		1			1	1		1	1
dvSave-2022_10_23_16_24_15	1			1		1	1		1					1
dvSave-2022_10_23_16_29_08	1			1		1	1	1	1					1
dvSave-2022_10_23_16_31_24	1			1		1	1		1					1
dvSave-2022_10_23_16_32_50		1		1		1	1	1	1	1
dvSave-2022_10_23_16_35_44		1				1	1	1	1	1
dvSave-2022_10_23_16_38_12		1		1		1	1	1	1	1
dvSave-2022_10_23_16_41_24	1			1		1	1		1					1
dvSave-2022_10_23_16_50_45	1			1		1	1	1	1					1
dvSave-2022_10_23_16_56_18	1					1							1	1
dvSave-2022_10_23_16_59_21		1				1			1
dvSave-2022_10_23_17_01_45	1					1							1	1
dvSave-2022_10_23_17_06_18	1			1	1	1	1		1					1
dvSave-2022_10_23_17_10_19	1				1	1			1					1
dvSave-2022_10_23_17_13_12	1				1	1			1					1
dvSave-2022_10_23_17_18_16	1					1			1					1
dvSave-2022_10_23_17_26_32	1				1	1			1			1		1
dvSave-2022_10_23_17_29_30	1					1	1		1					1
dvSave-2022_10_23_17_32_43	1			1		1	1		1					1
dvSave-2022_10_23_17_36_47	1					1			1					1
dvSave-2022_10_25_18_50_02	1			1	1	1	1		1					1
dvSave-2022_10_25_18_52_39	1			1	1	1	1		1					1
dvSave-2022_10_25_18_55_33	1			1	1	1	1		1					1
dvSave-2022_10_25_19_06_12		1		1	1		1	1	1
dvSave-2022_10_25_19_25_33	1			1	1	1	1		1					1
dvSave-2022_10_25_19_28_44	1			1	1	1	1		1					1
dvSave-2022_10_25_19_32_01	1			1	1	1	1		1					1
dvSave-2022_10_25_19_36_03		1		1	1	1	1	1	1
dvSave-2022_10_25_19_39_09	1			1	1	1	1		1					1
dvSave-2022_10_25_19_42_27		1		1	1	1	1	1	1	1
dvSave-2022_10_25_19_46_08		1		1	1	1	1	1	1	1	1
dvSave-2022_10_25_20_17_32	1			1	1	1	1		1					1
dvSave-2022_10_25_20_20_59	1			1	1	1			1					1
dvSave-2022_10_25_20_24_15	1			1	1	1	1		1					1
dvSave-2022_10_25_20_27_40	1			1	1	1	1		1					1
dvSave-2022_10_25_20_30_15	1			1		1	1		1					1
dvSave-2022_10_25_20_33_03	1			1	1	1	1		1					1
dvSave-2022_10_25_20_35_54		1		1	1	1	1		1
dvSave-2022_10_25_20_39_07	1			1	1	1	1		1					1
dvSave-2022_10_25_20_42_18	1			1	1	1	1		1					1
dvSave-2022_10_25_20_54_05		1			1	1	1		1		1
dvSave-2022_10_25_20_56_59		1		1	1	1	1	1	1
dvSave-2022_10_27_18_29_42				1		1	1		1
dvSave-2022_10_27_18_32_08				1		1	1		1
dvSave-2022_10_27_18_34_38						1			1
dvSave-2022_10_27_18_36_46				1		1	1		1
dvSave-2022_10_27_18_39_14		1				1	1		1
dvSave-2022_10_27_18_41_24				1		1	1		1
dvSave-2022_10_27_18_43_35	1			1		1	1	1						1
dvSave-2022_10_27_18_45_45		1				1
dvSave-2022_10_27_18_47_44	1			1		1	1							1
dvSave-2022_10_27_18_49_41	1			1		1								1
dvSave-2022_10_27_18_51_46	1			1		1								1
dvSave-2022_10_27_18_53_51	1			1		1	1		1					1
dvSave-2022_10_27_18_56_25	1			1		1	1							1
dvSave-2022_10_27_18_58_42	1			1		1			1					1
dvSave-2022_10_27_19_00_32		1		1		1	1		1
dvSave-2022_10_27_19_02_34	1			1		1	1		1					1
dvSave-2022_10_27_19_04_37		1		1		1	1		1
dvSave-2022_10_27_19_06_36		1		1		1	1		1	1
dvSave-2022_10_27_19_08_43		1		1		1	1		1	1
dvSave-2022_10_27_19_11_33	1			1		1			1					1
dvSave-2022_10_27_19_14_01	1			1		1			1					1
dvSave-2022_10_27_19_16_49				1		1			1					1
dvSave-2022_10_27_19_18_43				1		1			1					1
dvSave-2022_10_27_19_20_44									1					1
dvSave-2022_10_27_19_23_06									1					1
dvSave-2022_10_27_19_24_54				1		1			1					1
dvSave-2022_10_27_19_26_46				1		1			1					1
dvSave-2022_10_27_19_29_56	1					1			1					1
dvSave-2022_10_27_19_31_51	1			1		1			1					1
dvSave-2022_10_27_19_35_03							1
dvSave-2022_10_27_19_38_13	1			1		1	1		1					1
dvSave-2022_10_27_19_40_10	1					1			1					1
dvSave-2022_10_27_19_42_05	1			1		1			1					1
dvSave-2022_10_27_19_43_35	1			1		1			1					1
dvSave-2022_10_27_19_45_37	1					1			1					1
dvSave-2022_10_27_19_47_47	1			1		1			1					1
dvSave-2022_10_27_19_49_30	1			1		1			1					1
dvSave-2022_10_27_19_51_13	1			1		1			1					1
dvSave-2022_10_27_19_55_40		1				1	1		1	1	1
dvSave-2022_10_27_19_58_03	1			1		1			1					1
dvSave-2022_10_27_20_01_12		1				1	1		1	1	1
dvSave-2022_10_27_20_03_29	1			1		1	1		1					1
dvSave-2022_10_27_20_05_42	1			1		1			1					1
dvSave-2022_10_27_20_08_05		1		1			1		1		1
dvSave-2022_10_27_20_10_23	1			1		1								1
dvSave-2022_10_27_20_13_20						1								1
dvSave-2022_10_27_20_15_47	1			1		1			1					1
dvSave-2022_10_27_20_19_01		1		1		1	1		1
dvSave-2022_10_27_20_21_19	1			1		1								1
dvSave-2022_10_27_20_23_28	1			1		1			1					1
dvSave-2022_10_27_20_25_37	1			1		1			1					1
dvSave-2022_10_27_20_28_13	1			1		1			1					1
dvSave-2022_10_27_20_30_17	1			1		1			1					1
dvSave-2022_10_27_20_32_24		1								1	1
dvSave-2022_10_27_20_34_42	1			1		1								1
dvSave-2022_10_27_20_37_20		1				1				1
dvSave-2022_10_27_20_39_42	1			1		1			1					1
dvSave-2022_10_27_20_42_05	1			1		1			1					1
dvSave-2022_10_27_20_44_15	1			1		1								1
dvSave-2022_10_27_20_47_25		1		1		1	1		1	1
dvSave-2022_10_27_20_49_36	1			1		1			1					1
dvSave-2022_10_27_20_51_55	1			1		1			1					1
dvSave-2022_10_27_20_54_18	1			1		1		1	1					1
dvSave-2022_10_27_20_56_33		1		1	1	1	1		1		1
dvSave-2022_10_27_20_58_45	1			1	1	1			1					1
dvSave-2022_10_27_21_01_48	1			1	1	1			1					1
dvSave-2022_10_27_21_04_02	1			1	1	1			1					1
dvSave-2022_10_27_21_06_28	1			1	1	1			1					1
dvSave-2022_10_27_21_07_58	1			1	1	1			1					1
dvSave-2022_10_27_21_09_43	1			1	1	1			1					1
dvSave-2022_10_27_21_11_43		1			1	1			1
dvSave-2022_10_27_21_13_12	1			1	1				1					1
dvSave-2022_10_27_21_14_55	1			1	1	1			1					1
dvSave-2022_10_27_21_17_01		1			1	1		1		1
dvSave-2022_10_27_21_19_10		1		1	1	1	1				1
dvSave-2022_10_27_21_22_26	1			1	1	1			1					1
dvSave-2022_10_27_21_24_34		1		1	1	1	1			1
dvSave-2022_10_27_21_26_52	1			1	1	1			1					1
dvSave-2022_10_27_21_28_58	1			1	1	1		1	1					1
dvSave-2022_10_27_21_31_00	1			1	1	1			1					1
dvSave-2022_10_27_21_33_09	1			1	1	1			1					1
dvSave-2022_10_28_19_40_33	1				1	1								1
dvSave-2022_10_28_19_43_38				1	1	1	1		1
dvSave-2022_10_28_19_45_53	1			1	1	1	1		1					1
dvSave-2022_10_28_19_47_56	1			1	1	1			1					1
dvSave-2022_10_28_19_50_53	1				1	1			1					1
dvSave-2022_10_28_19_53_10	1			1	1				1					1
dvSave-2022_10_28_19_55_23	1				1	1			1					1
dvSave-2022_10_28_19_57_49	1			1	1	1			1					1
dvSave-2022_10_28_20_00_11		1		1	1		1		1
dvSave-2022_10_28_20_02_35				1	1		1		1
dvSave-2022_10_28_20_04_18				1	1		1		1
dvSave-2022_10_28_20_07_02					1	1	1		1
dvSave-2022_10_28_20_08_52		1		1	1		1		1
dvSave-2022_10_28_20_10_53	1			1	1	1			1					1
dvSave-2022_10_28_20_14_09	1			1	1	1			1					1
dvSave-2022_10_28_20_16_33	1			1	1	1			1					1
dvSave-2022_10_28_20_18_44	1			1	1	1			1					1
dvSave-2022_10_28_20_20_27					1	1			1
dvSave-2022_10_28_20_22_29	1				1	1			1					1
dvSave-2022_10_28_20_24_32	1				1	1			1					1
dvSave-2022_10_28_20_28_47	1			1	1				1					1
dvSave-2022_10_28_20_31_52	1				1	1			1					1
dvSave-2022_10_28_20_34_35	1				1	1			1					1
dvSave-2022_10_28_20_38_50		1			1	1			1
dvSave-2022_10_28_20_47_12		1		1	1	1			1
dvSave-2022_10_28_20_49_27		1			1	1			1
dvSave-2022_10_28_20_51_33	1				1	1			1					1
dvSave-2022_10_28_20_54_15		1		1	1	1	1		1
dvSave-2022_10_28_21_02_23		1			1	1			1
dvSave-2022_10_28_21_04_32		1			1	1			1	1
dvSave-2022_10_28_21_07_39	1				1	1			1					1
dvSave-2022_10_29_16_36_53	1			1		1			1				1	1
dvSave-2022_10_29_16_39_27	1			1		1	1		1				1	1
dvSave-2022_10_29_16_42_05	1			1		1	1		1				1	1
dvSave-2022_10_29_16_44_19	1			1		1	1		1				1	1
dvSave-2022_10_29_16_46_36	1			1			1		1				1	1
dvSave-2022_10_29_16_48_33		1		1			1		1
dvSave-2022_10_29_16_50_53						1			1	1		1	1
dvSave-2022_10_29_16_53_30		1		1			1		1				1
dvSave-2022_10_29_16_55_41		1				1			1	1
dvSave-2022_10_29_16_57_47						1			1
dvSave-2022_10_29_16_59_55						1			1
dvSave-2022_10_29_17_02_42	1			1		1			1				1	1
dvSave-2022_10_29_17_04_47	1			1		1			1		1		1	1
dvSave-2022_10_29_17_07_00		1		1			1		1
dvSave-2022_10_29_17_07_51	1			1		1			1		1		1	1
dvSave-2022_10_29_17_10_22	1			1		1			1		1		1	1
dvSave-2022_10_29_17_14_12	1			1		1			1		1		1	1
dvSave-2022_10_29_17_17_32	1			1		1			1		1		1	1
dvSave-2022_10_29_17_21_03		1				1			1			1
dvSave-2022_10_29_17_24_00	1			1		1			1				1	1
dvSave-2022_10_29_17_26_41		1		1		1	1		1			1
dvSave-2022_10_29_17_29_22		1				1	1		1	1		1
dvSave-2022_10_29_17_31_13		1		1			1		1			1
dvSave-2022_10_29_17_33_35	1			1		1			1			1	1	1
dvSave-2022_10_29_17_36_22	1			1		1			1				1	1
dvSave-2022_10_29_17_39_06		1		1			1		1
dvSave-2022_10_29_17_40_52	1			1		1			1				1	1
dvSave-2022_10_29_17_44_08	1			1		1			1				1	1
dvSave-2022_10_29_17_46_43	1			1		1			1				1	1
dvSave-2022_10_29_17_49_29	1			1	1	1			1			1	1	1
dvSave-2022_10_29_17_53_34							1		1		1
dvSave-2022_10_29_17_56_15	1			1		1			1					1
dvSave-2022_10_29_17_58_25	1					1			1					1
dvSave-2022_10_29_18_00_33	1			1		1						1		1
dvSave-2022_10_29_18_02_39	1			1		1		1						1
dvSave-2022_10_29_18_04_50	1			1		1								1
dvSave-2022_10_29_18_07_00	1			1		1								1
dvSave-2022_10_30_20_22_07							1				1
dvSave-2022_10_30_20_24_15	1					1								1
dvSave-2022_10_30_20_26_49	1			1		1			1					1
dvSave-2022_10_30_20_29_00									1		1
dvSave-2022_10_30_20_31_26											1
dvSave-2022_10_30_20_33_36	1					1								1
dvSave-2022_10_30_20_35_53							1		1		1
dvSave-2022_10_30_20_37_52	1					1							1	1
dvSave-2022_10_30_20_40_13	1			1		1			1				1	1
dvSave-2022_10_30_20_41_50		1				1
dvSave-2022_10_30_20_43_58									1
dvSave-2022_10_30_20_46_25	1					1			1				1	1
dvSave-2022_10_30_20_48_16	1					1			1					1
dvSave-2022_10_30_20_50_02							1		1
dvSave-2022_10_30_20_51_41	1	1		1		1			1					1
dvSave-2022_10_30_20_53_17									1
dvSave-2022_10_30_20_55_03							1		1
dvSave-2022_10_30_20_56_53	1					1			1					1
dvSave-2022_10_30_20_58_36	1			1		1			1					1
dvSave-2022_10_30_21_00_27									1
dvSave-2022_10_30_21_02_20	1					1	1		1				1	1
dvSave-2022_10_30_21_04_16	1			1		1			1				1	1
dvSave-2022_10_30_21_06_21	1			1		1	1		1				1	1
dvSave-2022_10_30_21_08_32	1			1		1	1		1				1	1
dvSave-2022_10_30_21_10_12	1			1			1		1					1
dvSave-2022_10_30_21_12_02									1
dvSave-2022_10_30_21_14_00		1				1	1		1
dvSave-2022_10_30_21_15_36						1			1
dvSave-2022_10_30_21_17_24	1					1			1				1	1
dvSave-2022_10_30_21_19_12									1
dvSave-2022_10_30_21_20_58	1					1			1				1	1
dvSave-2022_10_31_09_46_48	1					1							1
dvSave-2022_10_31_09_49_38	1	1				1							1
dvSave-2022_10_31_09_58_00	1	1				1
dvSave-2022_10_31_10_01_49	1	1				1
dvSave-2022_10_31_10_03_46	1	1				1							1
dvSave-2022_10_31_10_06_10	1	1				1	1		1
dvSave-2022_10_31_10_08_04	1	1				1
dvSave-2022_10_31_10_10_17	1	1				1
dvSave-2022_10_31_10_13_20	1	1				1	1
dvSave-2022_10_31_10_15_22	1	1				1	1
dvSave-2022_10_31_10_17_18	1	1				1
dvSave-2022_10_31_10_19_27	1	1				1			1
dvSave-2022_10_31_10_21_40	1	1				1			1
dvSave-2022_10_31_10_25_58	1	1				1							1
dvSave-2022_10_31_10_28_29	1	1				1							1
dvSave-2022_10_31_10_30_39	1	1				1							1
dvSave-2022_10_31_10_32_23	1	1				1							1
dvSave-2022_10_31_10_34_32	1	1				1							1
dvSave-2022_10_31_10_36_36	1	1			1	1
dvSave-2022_10_31_10_38_32	1	1			1	1
dvSave-2022_10_31_10_40_54	1	1			1	1
dvSave-2022_10_31_10_42_54	1				1	1				1
dvSave-2022_10_31_10_45_11	1	1			1	1				1
dvSave-2022_10_31_10_47_25	1	1			1	1				1
dvSave-2022_10_31_10_50_07	1	1			1	1				1
dvSave-2022_10_31_10_52_10	1	1			1	1
dvSave-2022_10_31_10_54_16	1	1			1	1
dvSave-2022_10_31_10_56_34	1	1			1	1
